# Supplementary material
Source: publisher site journal article supplement (https://static.cambridge.org/content/id/urn:cambridge.org:id:article:S1368980019004853/resource/name/S1368980019004853supp001.doc)
Supplement: Supplementary file 1 [file S1368980019004853supp001.doc]

**Supplementary table 1.** The means of lung function indicators by height (or length)-for-age speed of growth trajectory

|  | Lung function | Normal stature | | Catch-up growth | | Unaltered growth velocity | | Faltering of growth | | p value$ |
| --- | --- | --- | --- | --- | --- | --- | --- | --- | --- | --- |
|  |  | mean | SD | mean | SD | mean | SD | mean | SD |  |
| 1 y to 2 y; n=450 | | n=197 | | n=8 | | n=168 | | n=77 | |  |
|  | FVC (ml) | 1129.4 | 86.5 | 1112.7 | 67.2 | 1121.4 | 78.8 | 1087.3cd | 82.9 | 0.002 |
|  | FEV1 (ml/s) | 1111.5 | 84.1 | 1094.6 | 67.6 | 1102.4 | 76.6 | 1071.3cd | 78.8 | 0.003 |
|  | FEV1/FVC ratio, % | 98.5 | 0.71 | 98.5 | 0.54 | 98.4 | 0.68 | 98.7 | 0.69 | 0.086 |
|  | MMF (ml/s) | 2031.1 | 153.7 | 2005.7 | 159.7 | 2020.9 | 111.8 | 1984.8 | 130.6 | 0.088 |
|  | PEF (ml/s) | 2595.6 | 249.3 | 2561.9 | 261.9 | 2595.9 | 205.6 | 2512.8cd | 227.6 | 0.036 |
| 2 y to 4.5 y; n=467 | | n=204 | | n=80 | | n=182 | | n=1 | |  |
|  | FVC (ml) | 1128.6 | 86.9 | 1121.1 | 82.7 | 1103.8 | 80.7 | 1120.7 | - | 0.036 |
|  | FEV1 (ml/s) | 1110.6 | 84.4 | 1103.4 | 80.2 | 1085.3 | 77.4 | 1110.7 | - | 0.023 |
|  | FEV1/FVC ratio, % | 98.5 | 0.71 | 98.5 | 0.74 | 98.5 | 0.66 | 99.1 | - | 0.685 |
|  | MMF (ml/s) | 2029.9 | 152.0 | 2034.6 | 120.4 | 1997.1 | 118.1 | 2047.1 | - | 0.065 |
|  | PEF (ml/s) | 2593.0 | 247.8 | 2620.8 | 220.4 | 2542.8 | 198.9 | 2590.7 | - | 0.042 |
| 4.5 y to 9 y; n=515 | | n=231 | | n=35 | | n=238 | | n=11 | |  |
|  | FVC (ml) | 1133.1 | 87.4 | 1089.3a | 51.6 | 1112.6b | 83.6 | 1131.7 | 75.9 | 0.006 |
|  | FEV1 (ml/s) | 1114.1 | 83.1 | 1071.9a | 50.7 | 1094.3b | 80.5 | 1109.8 | 76.8 | 0.006 |
|  | FEV1/FVC ratio, % | 98.5 | 1.0 | 98.5 | 0.81 | 98.5 | 0.65 | 98.1 | 0.70 | 0.551 |
|  | MMF (ml/s) | 2028.9 | 155.9 | 1988.2 | 99.2 | 2014.3 | 125.4 | 2006.3 | 36.0 | 0.348 |
|  | PEF (ml/s) | 2601.4 | 242.5 | 2496.3 | 175.5 | 2579.3 | 213.6 | 2584.9 | 110.0 | 0.076 |

Abbreviation; FEV1.0, forced expiratory volume per second; FVC, forced vital capacity; MMF, maximum mid-expiratory flow; PEF, peak expiratory flow; SD, standard deviation.

*The mean values of lung function were standardized with sex and child age (months) at 9-years follow-up.

$The Mann-Whitney U tests

aSignificant mean differences between normal stature and catch-up growth groups, p <0.05 (Bonferroni test)

bSignificant mean differences between normal stature and unaltered growth velocity groups, p <0.05 (Bonferroni test)

cSignificant mean differences between normal stature and growth faltering groups, p <0.05 (Bonferroni test)

dSignificant mean differences between unaltered growth velocity and growth faltering groups, p <0.05 (Bonferroni test)
